# Supplementary material
Source: publisher figshare collection journal article supplement (https://plos.figshare.com/articles/dataset/_/1355257)
Supplement: Supplementary file 1 [file 1 › S1_Table.pdf]

**S1 Table. Additional specimens examined.**

***Microhyla ornata* (10 specimens):** Zoological Survey of India. ZSI A9080/1– A9080/10. **Collected from:** Lukunda estate, Vigarpet District, Srimangala Nadu, South Coorg, Karnataka, India.

***Microhyla rubra* (5 specimens):** Zoological Survey of India. ZSI A9110, **Collected from:** Lukunda estate, Vigarpet District, Srimangala Nadu, South Coorg, Karnataka, India. ZSI A10810, ZSI A10810/1, ZSI A10810/2, **Collected from:** In and Around Murkal Forest Rest House, Karnataka, India.

***Microhyla sholigari* (5 specimens):** Zoological Survey of India: ZSI A9061– A9065. **Collected from:** Biligirirangan Hills, Chamrajanagar District, Yelandur Taluk, Karnataka, India.
