# Supplementary material
Source: publisher figshare collection journal article supplement (https://plos.figshare.com/articles/dataset/_/1355257)
Supplement: Supplementary file 1 [file 1 › S2_Table.pdf]

**S2 Table. Gene sequences compared and deposited in GenBank.**

| Species                           | Voucher       | Collection locality                            | GenBank accession numbers<br>(16S rRNA)                                                | Reference       |
|-----------------------------------|---------------|------------------------------------------------|----------------------------------------------------------------------------------------|-----------------|
| Compared gene sequences           |               |                                                |                                                                                        |                 |
| <i>Microhyla ornata</i>           | ZSI-A9119     | Dhawad, Karnataka, India                       | AB201188                                                                               | [1]             |
| <i>Microhyla butleri</i>          | KUHE33557     | Bangkok, Thailand                              | AB201189                                                                               | [1]             |
| <i>Microhyla okinavensis</i>      | IABHU5263     | -----                                          | AB303950                                                                               | [2]             |
| <i>Microhyla fissipes</i>         | KUHE35165     | Kanchanaburi, Thailand                         | AB201186                                                                               | [1]             |
| <i>Microhyla heymonsi</i>         | -----         | -----                                          | AY458596                                                                               | [3]             |
| <i>Microhyla perparva</i>         | -----         | Kubah National Park, Malaysia                  | GU154884                                                                               | [4]             |
| <i>Microhyla rubra</i>            | -----         | Dhawad, Kerala, India                          | AB201192                                                                               | [1]             |
| <i>Microhyla berdmorei</i>        | KUHE 52034    | Gombak, Malaysia                               | AB598338                                                                               | [5]             |
| <i>Microhyla mixtura</i>          | CIB 20070248  | China, Sichuan                                 | AB634669                                                                               | [5]             |
| <i>Microhyla malang</i>           | KUHE 42597    | Kanowit, Sibul Division, Malaysia              | AB598322                                                                               | [6]             |
| <i>Microhyla achatina</i>         | MZB Amp 16401 | Ungaran, Java, Indonesia                       | AB598335                                                                               | [6]             |
| <i>Microhyla mantheyi</i>         | KUHE 52556    | Temerloh, Pahang, Malaysia                     | AB598334                                                                               | [6]             |
| <i>Microhyla pulchra</i>          | KUHE35119     | Kanchanaburi, Thailand                         | AB201191                                                                               | [1]             |
| <i>Microhyla superciliaris</i>    | KUHE 52558    | Pahang, Temerloh, Malaysia                     | AB634682                                                                               | [5]             |
| <i>Microhyla fowleri</i>          | KUHE 21992    | Phrae, Mae Yom, Thailand                       | AB634667                                                                               | [5]             |
| <i>Microhyla annectens</i>        | KUHE 52438    | Pahang, Cameron, Malaysia                      | AB634659                                                                               | [5]             |
| <i>Microhyla palmipes</i>         | MZB Amp 16323 | Sumatra, Bengkulu, Indonesia                   | AB634671                                                                               | [5]             |
| <i>Microhyla marmorata</i>        | KUHE 32455    | Houapan, Xamneua, Laos                         | AB611955                                                                               | [7]             |
| <i>Microhyla petrigena</i>        | KUHE 53743    | Sarawak, Bukit Kana, Malaysia                  | AB634675                                                                               | [5]             |
| <i>Microhyla mukhlesuri</i>       | IABHU3880     | Raozan, Chittagong, Bangladesh                 | AB543609                                                                               | [8]             |
| <i>Microhyla mymensinghensis</i>  | IABHU3899     | Golapganj, Sylhet, Bangladesh                  | AB543607                                                                               | [8]             |
| <i>Chaperina fusca</i> (outgroup) | FMNH 231111   | Sabah, Danum Valley, Research Center, Malaysia | DQ283145                                                                               | [9]             |
| <i>Gastrophryne olivacea</i>      | UTA A-60976   | Kleberg Co., Texas, USA                        | JQ268514                                                                               | [10]            |
| <i>Gastrophryne mazatlanensis</i> | MVZ 228275    | Santa Cruz Co., Arizona, USA                   | JQ268527                                                                               | [10]            |
| Deposited gene sequences          |               |                                                |                                                                                        |                 |
| <i>Microhyla nilphamariensis</i>  | MZH-2360-66   | Saidpur, Bangladesh                            | KP072787,<br>KP072788,<br>KP072789,<br>KP072790,<br>KP072791,<br>KP072792,<br>KP072793 | [Present study] |
| <i>Microhyla ornata</i>           | RGCB15059     | Pulpally, Wayanad District, Kerala, India      | KP072794                                                                               | [Present study] |

**Museum abbreviations:** CIB (Chengdu Institute of Biology, Chinese Academy of Sciences), FMNH (Field Museum, Chicago), IABHU (Institute for Amphibian Biology, Graduate School of Science, Hiroshima University), KUHE (Kyoto University, Graduate School of Human and Environmental Studies), MZB (Museum Zoologicum Bogoriense), MZD (Finnish Museum of Natural History), and RGCB (Rajiv Gandhi Centre for Biotechnology), UTA (University of Texas at Arlington) and MVZ, (Museum of Vertebrate Zoology, USNM FS, Smithsonian Institute Natural History Museum Field Series).

## References:

1. Matsui M, Ito H, Shimada T, Ota H, Saidapur SK, Khonsue W, et al. Taxonomic relationships within the pan-oriental narrow-mouth toad *Microhyla ornata* as revealed by mtDNA analysis. *Zoological Science*. 2005; 22: 489–495.
2. Igawa T, Kurabayashi A, Usuki C, Fujii T, Sumida M. Complete mitochondrial genomes of three neobatrachian anurans: a case study of divergence time estimation using different data and calibration settings. *Gene*. 2008; 407: 116–129.
3. Zhang P, Zhou H, Chen YQ, Liu YF, Qu LH. Mitogenomic Perspectives on the Origin and Phylogeny of Living Amphibians. *Systematic Biology*. 2005; 54: 391–400.
4. Das I, Haas A. New species of *Microhyla* from Sarawak: Old World's smallest frogs. *Zootaxa*. 2010; 2571: 37–52
5. Matsui M, Hamidy A, Belabut DM, Ahmad N, Panha S, Sudin A, et al. Systematic relationships of Oriental tiny frogs of the family Microhylidae (Amphibia, Anura) as revealed by mtDNA genealogy. *Molecular Phylogenetics and Evolution*. 2011; 61: 167–176.
6. Matsui M. Taxonomic revision of one of the Old World's smallest frogs, with description of a new Bornean *Microhyla* (Amphibia, Microhylidae). *Zootaxa*. 2011; 2814: 33–49.
7. Kurabayashi A, Matsui M, Belabut DM, Yong HS, Ahmad N. From Antarctica or Asia? New colonization scenario for Australian-New Guinean narrow mouth toads suggested from the findings on a mysterious genus *Gastrophrynoides*. *BMC Evolutionary Biology*. 2011; 11:175. doi:10.1186/1471-2148-11-175.
8. Hasan M, Islam MM, Khan MMR, Alam MS, Kurabayashi A, Igawa T, et al. Cryptic anuran biodiversity in Bangladesh revealed by mitochondrial 16S rRNA gene sequences. *Zoological Science*. 2012; 29: 162–172.
9. Frost DR, Grant T, Faivovich J, Bain RH, Haas A, Haddad CFB, et al. The amphibian tree of life. *Bulletin of the American Museum of Natural History*. 2006; 297: 1–370.
10. Streicher JW, Cox CL, Campbell JA, Smith EN and de Sa RO. Rapid range expansion in the Great Plains narrow-mouthed toad (*Gastrophryne olivacea*) and a revised taxonomy for North American microhylids. *Molecular Phylogenetics and Evolution*, 2012; 64: 645–653.
