# Supplementary material
Source: publisher figshare collection journal article supplement (https://plos.figshare.com/articles/dataset/_/1355257)

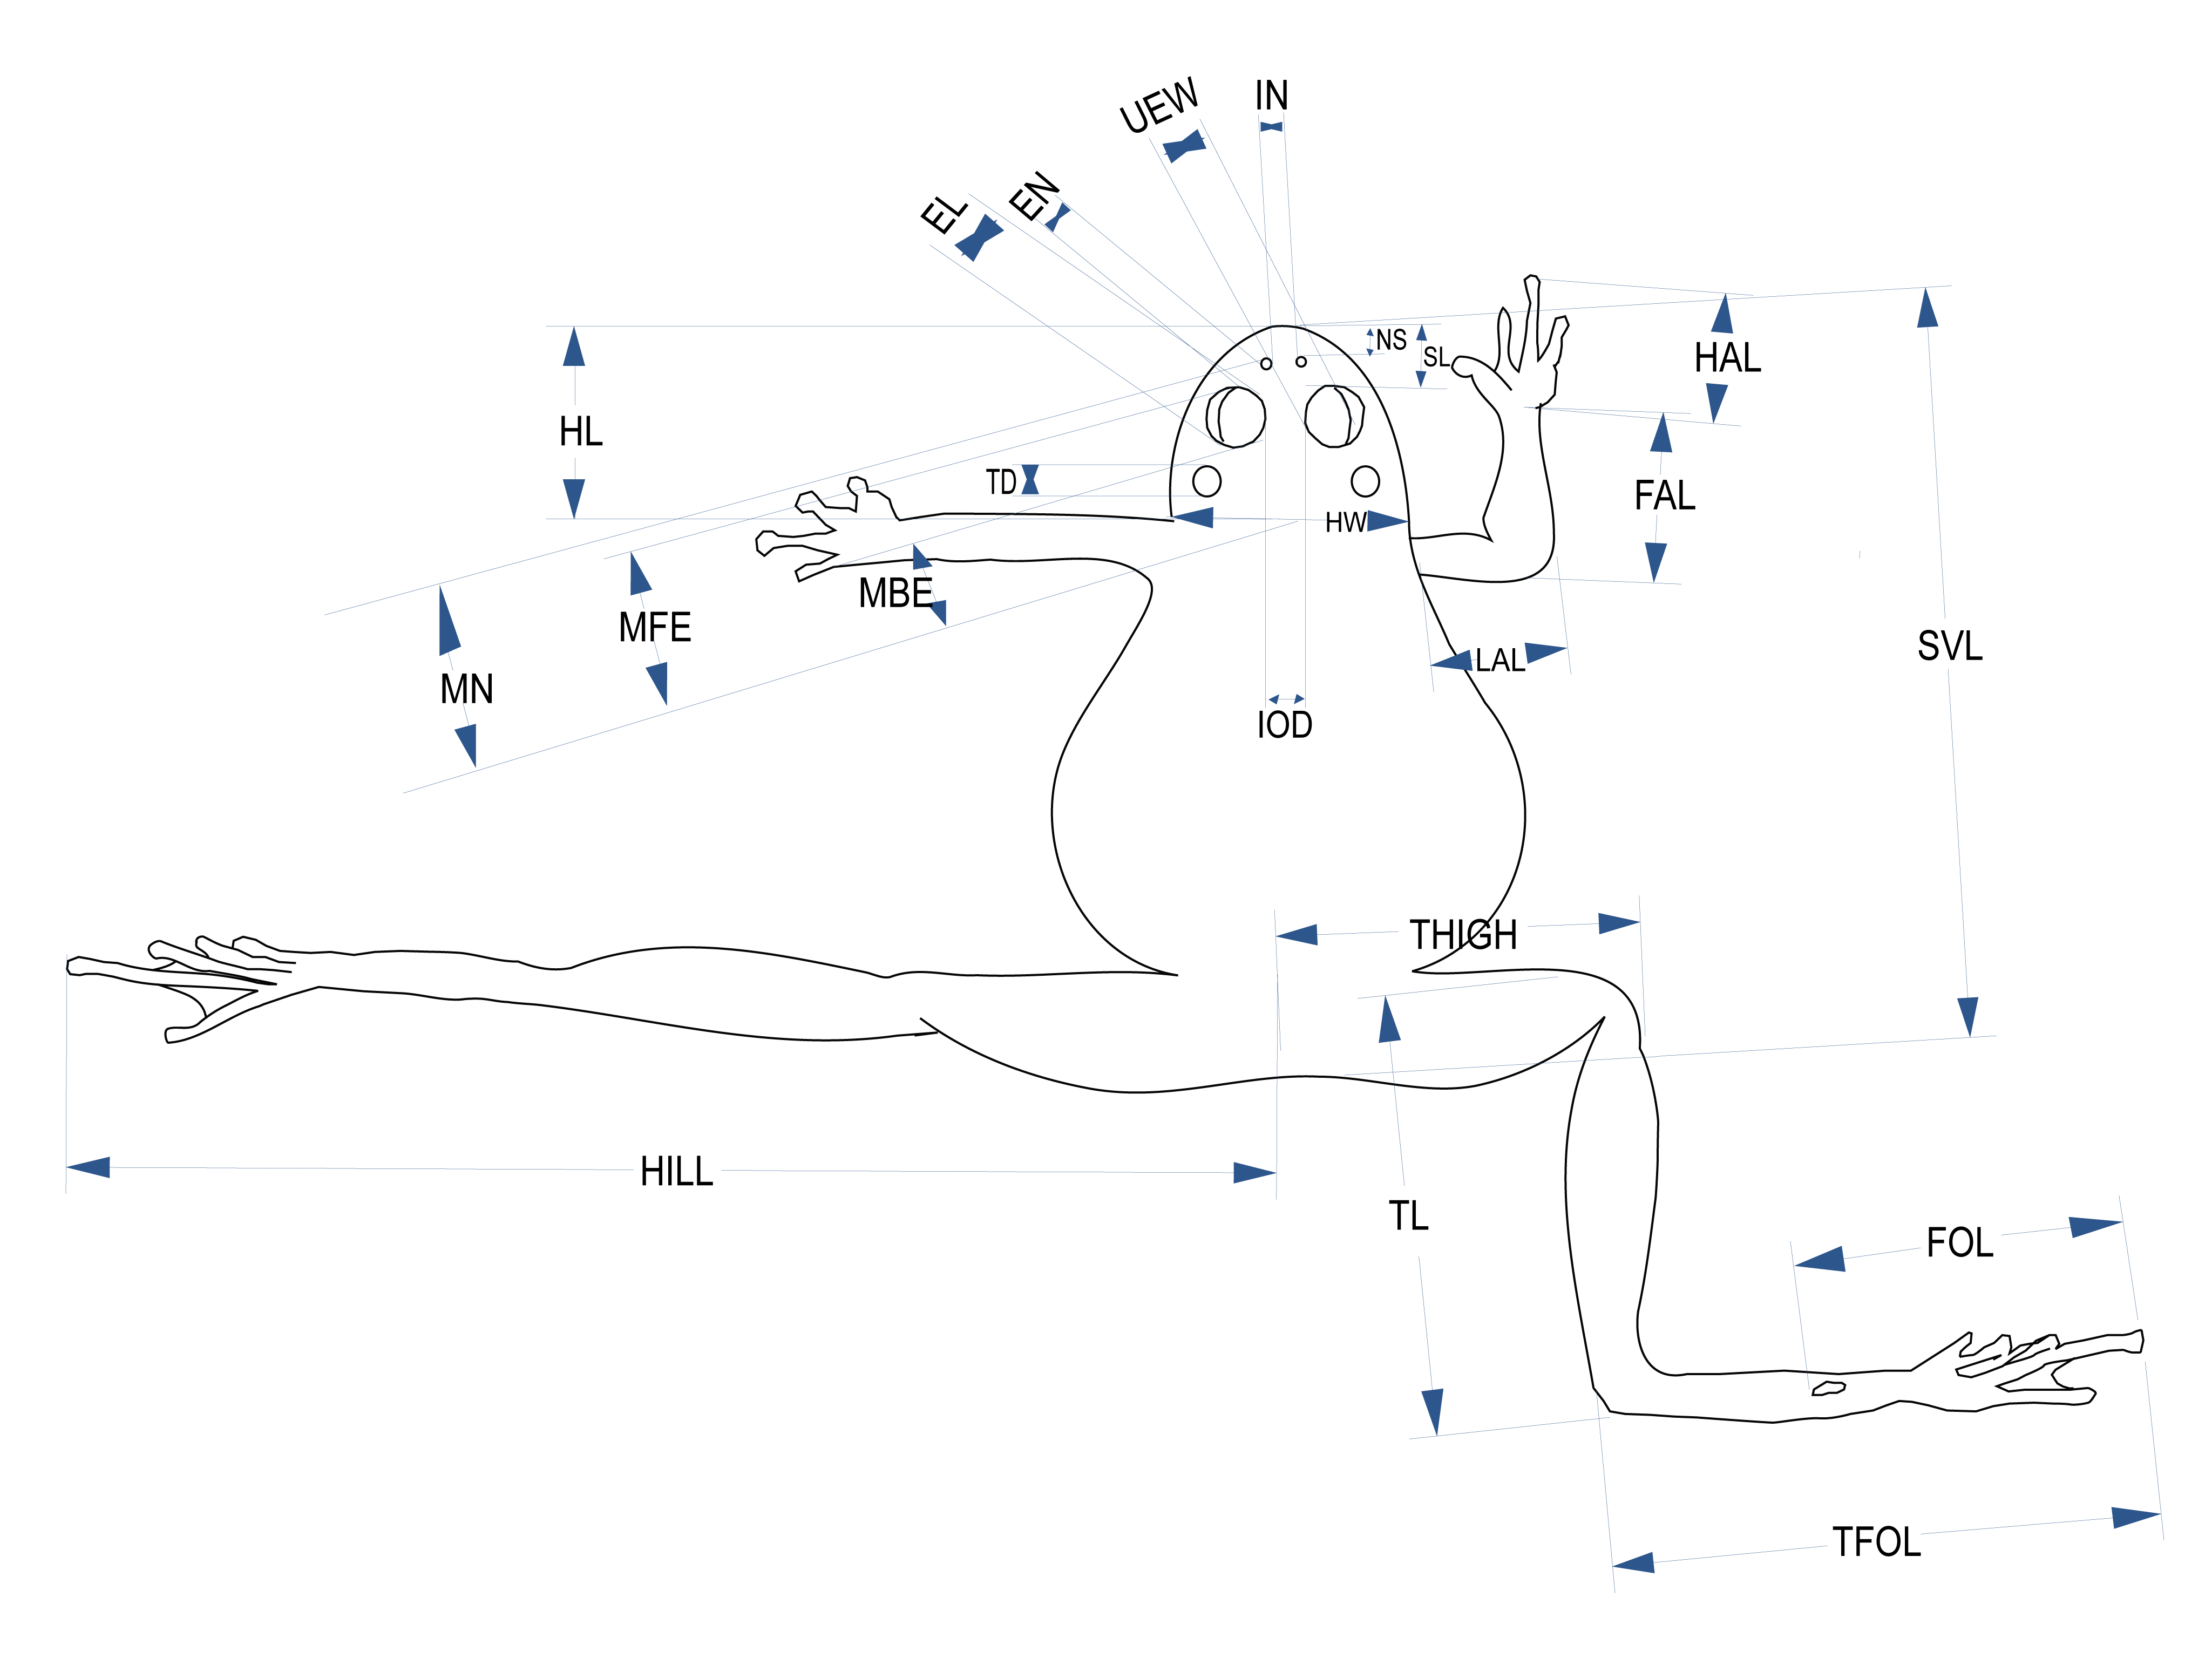

Supplement: Supplementary file 1 [file 1 › S1_Fig.tif]

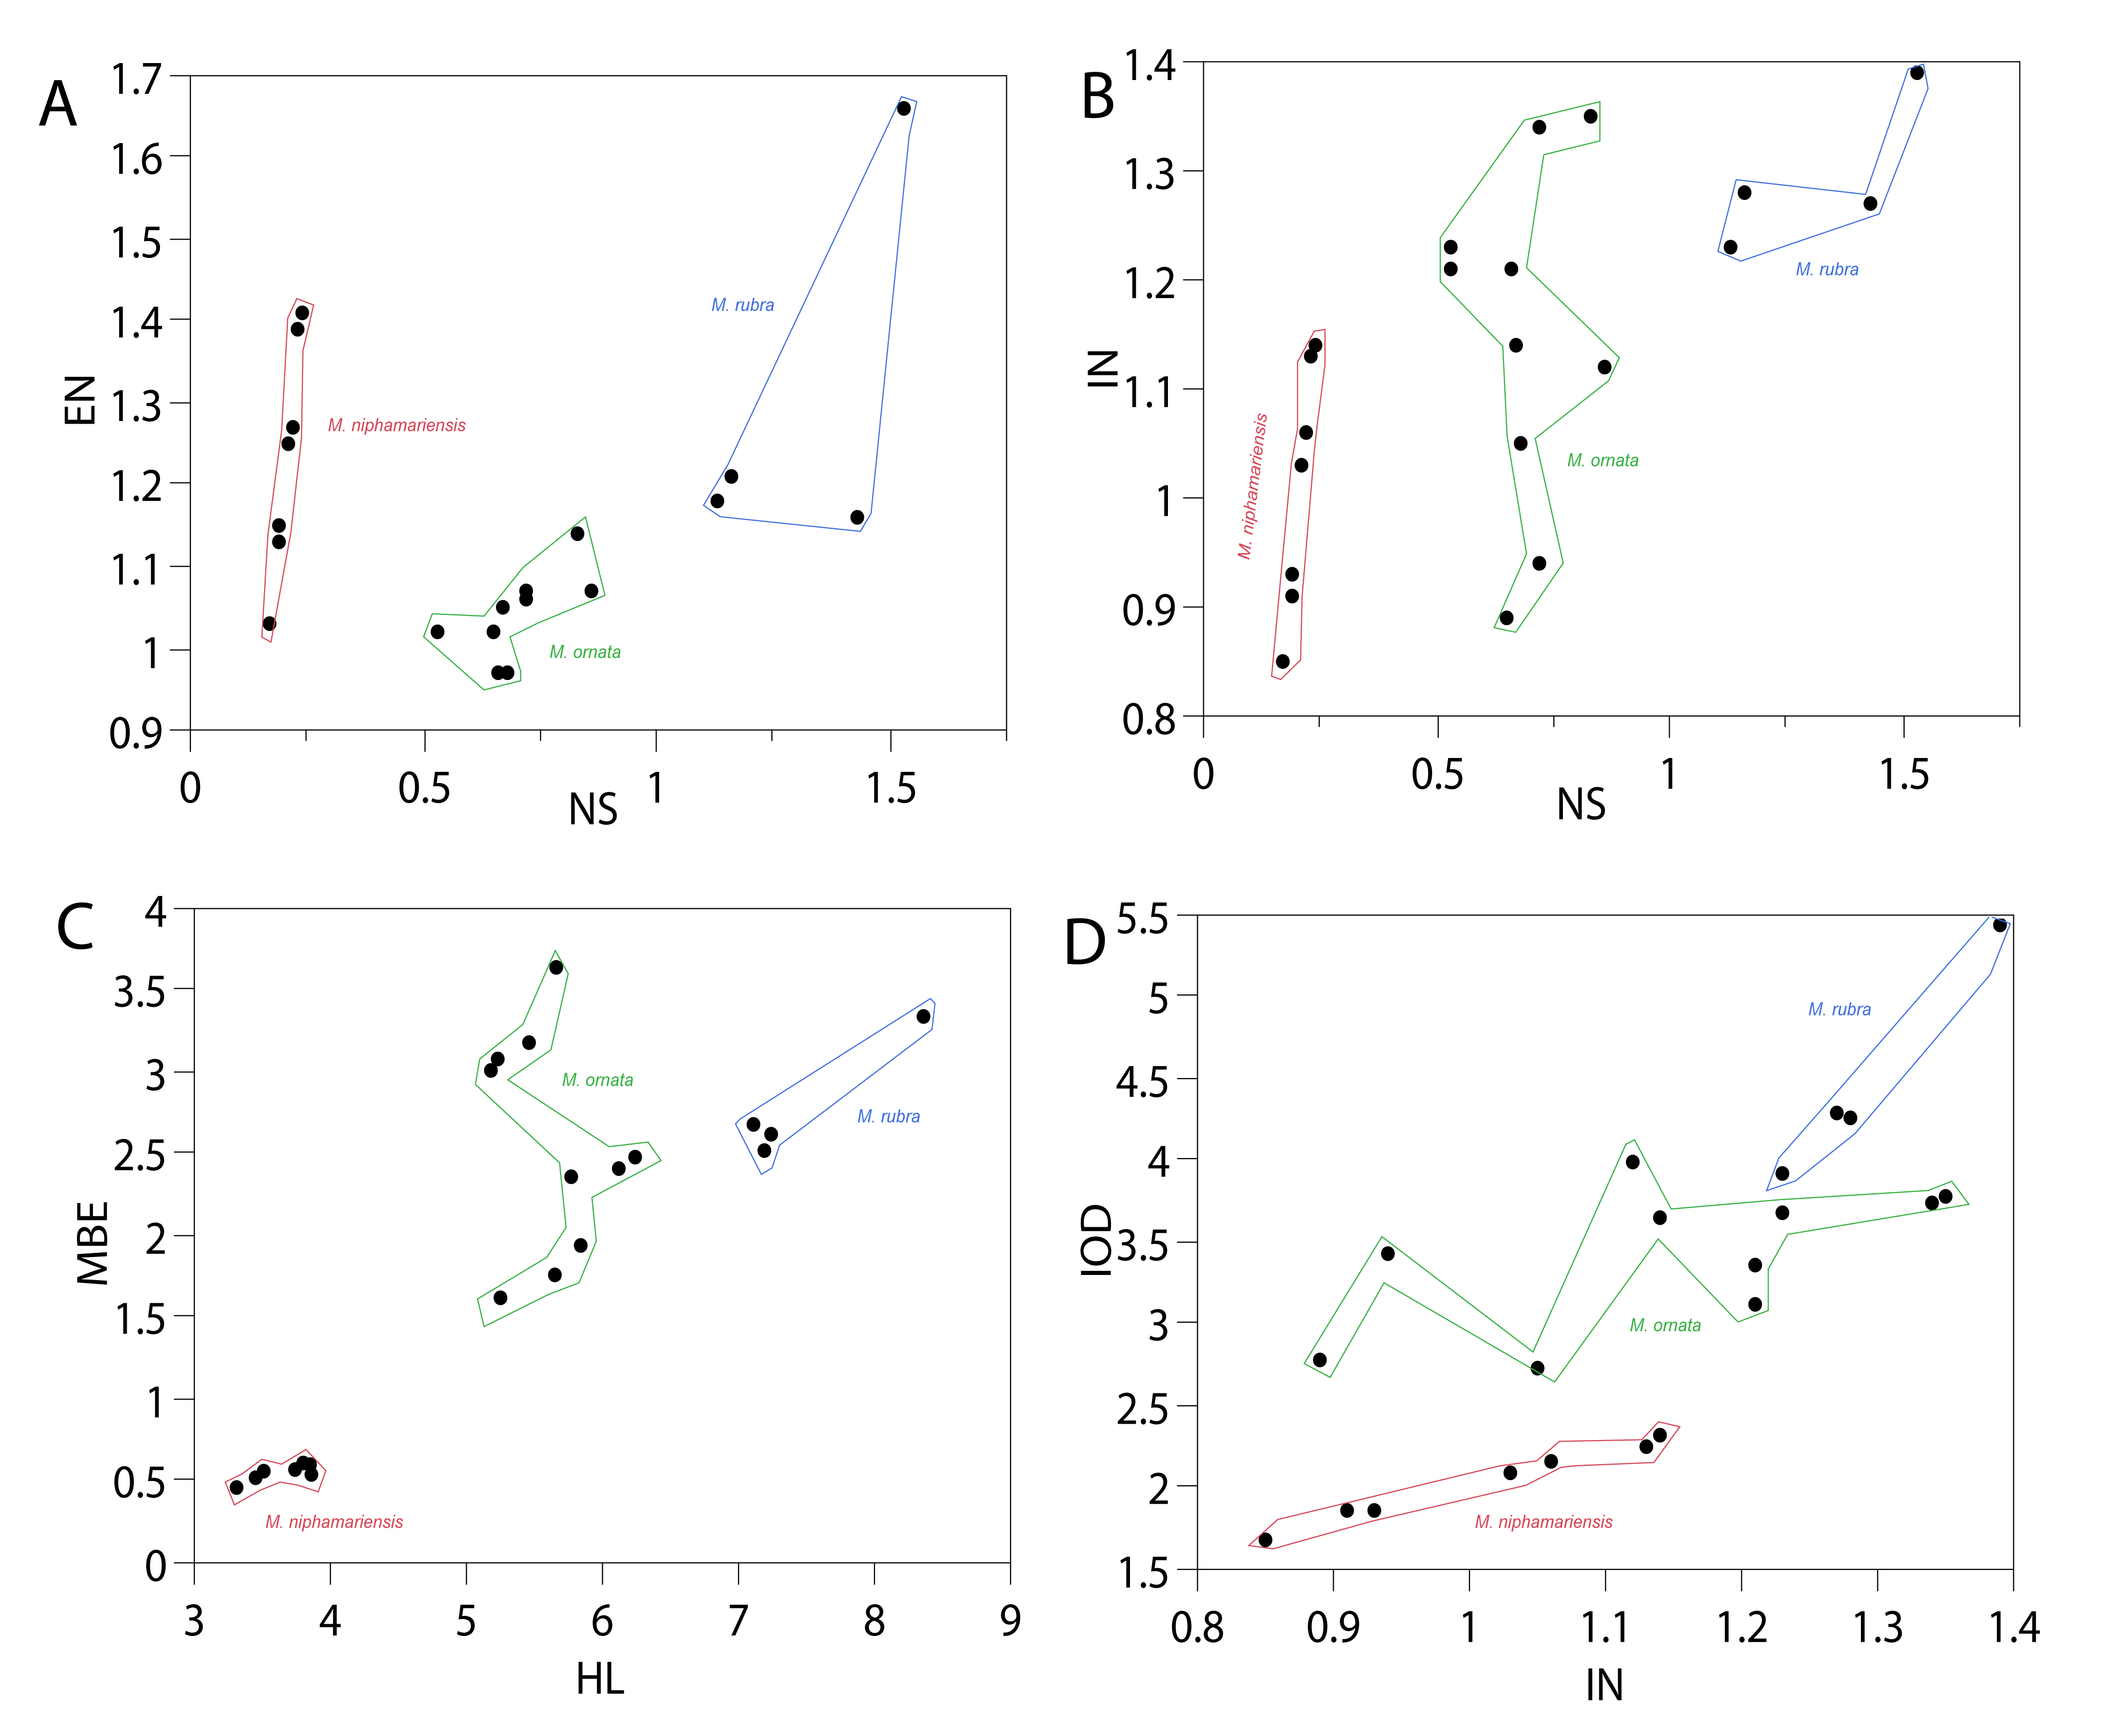

Supplement: Supplementary file 1 [file 1 › S2_Fig.tif]

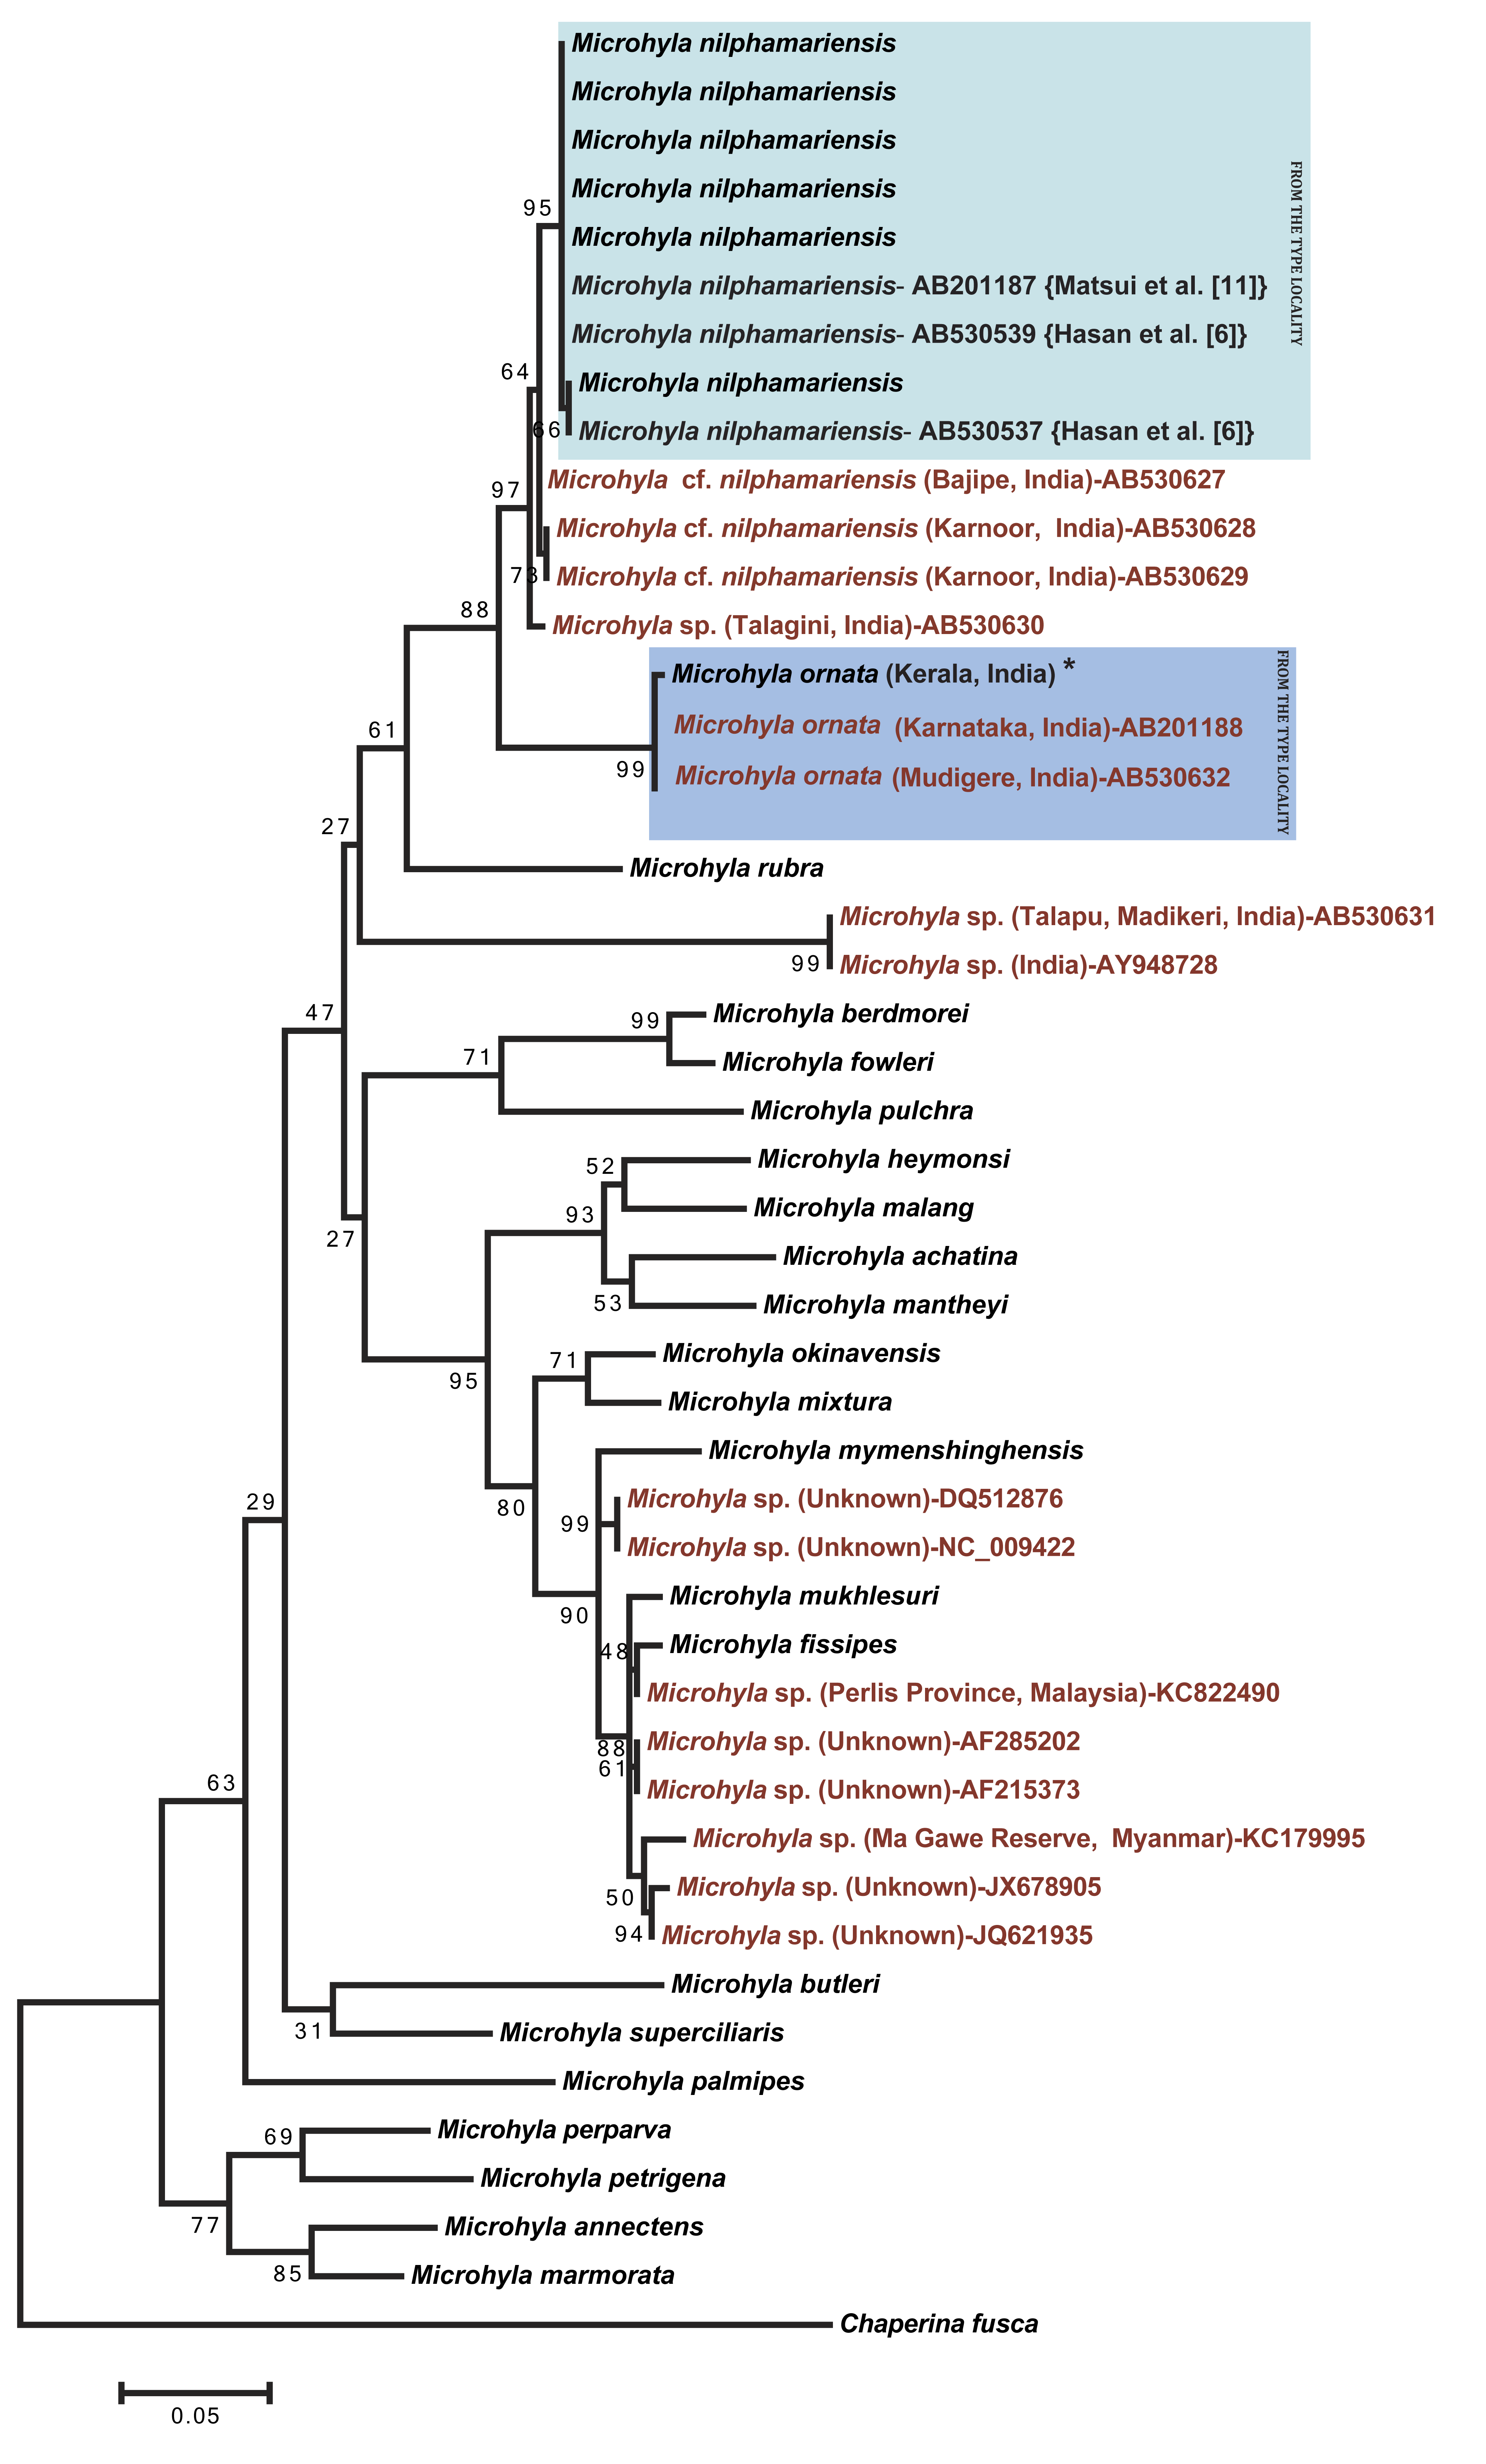

Supplement: Supplementary file 1 [file 1 › S3_Fig.tif]
